# Supplementary material
Source: MDPI journal article supplement (https://www.mdpi.com/1424-2818/11/3/29)
Supplement: s1 [file s1]

# Biocide treatment of invasive signal crayfish: successes, failures and lessons learned

Stephanie Peay<sup>1,2\*</sup>, Stein I. Johnsen<sup>3</sup>, Colin W. Bean<sup>4</sup>, Alison M. Dunn<sup>5</sup>, Roar Sandodden<sup>6</sup> and Lennart Edsman<sup>7</sup>

<sup>1</sup> AECOM, 5<sup>th</sup> Floor, 2 City Walk, Leeds, LS11 9AR, UK; stephanie.peay@aecom.com

<sup>2</sup> School of Biology, University of Leeds, Leeds, LS2 9JT, UK; stephanie@crayfish.org.uk

<sup>3</sup> Norwegian Institute for Nature Research – NINA, NO-2624 Lillehammer, Norway; Stein.Ivar.Johnsen@nina.no

<sup>4</sup> Scottish Natural Heritage, Clydebank, Glasgow, G81 2NR, UK; colin.bean@snh.gov.uk

<sup>5</sup> School of Biology, University of Leeds, Leeds, LS2 9JT, UK; a.dunn@leeds.ac.uk

<sup>6</sup> Norwegian Veterinary Institute, section for Environmental and Biosecurity Measures, Tungasletta 2, NO-7047 Trondheim, Norway; roar.sandodden@vetinst.no

<sup>7</sup> Swedish University of Agricultural Sciences, Department of Aquatic Resources, Institute of Freshwater Research, SE 178 93 Drottningholm, Sweden; lennart.edsman@slu.se

\* Correspondence: stephanie@crayfish.org.uk; Tel.: +44-(0)787-685-3606

## Supplementary Material

**Table S1:** Outline of stages of work likely to be required for a biocide treatment against invasive crayfish

**Table S2:** Details of projects in the UK where biocide treatment against signal crayfish was carried out

**Table S3:** Details of projects in Norway and Sweden where treatment against signal crayfish was carried out using synthetic pyrethroids

**Table S4:** Summary of projects in the UK in which feasibility of biocide treatment against signal crayfish was assessed, but treatment was not carried out

**Table S5:** Annual monitoring results of crayfish trapping at sites treated with natural pyrethrum

Supplementary Table S1. Outline of stages of work likely to be required for a biocide treatment against invasive crayfish

| <b>Work potentially required for a biocide treatment against invasive crayfish</b>                                                                                                                                                                                                                                                                                                                                                                                                                                                                                                                                                                                                                                                                                                                                                                                                                                                                                                                                                                                                                                                                                                                                                                                                                                                                                                                                                                                                                                                                                                                                                                                                                                                                                                                                                                                                                                                                                                                                                                                                                                                                                                                                                                                                                                                                                                                                                                                                                                                                                            |
|-------------------------------------------------------------------------------------------------------------------------------------------------------------------------------------------------------------------------------------------------------------------------------------------------------------------------------------------------------------------------------------------------------------------------------------------------------------------------------------------------------------------------------------------------------------------------------------------------------------------------------------------------------------------------------------------------------------------------------------------------------------------------------------------------------------------------------------------------------------------------------------------------------------------------------------------------------------------------------------------------------------------------------------------------------------------------------------------------------------------------------------------------------------------------------------------------------------------------------------------------------------------------------------------------------------------------------------------------------------------------------------------------------------------------------------------------------------------------------------------------------------------------------------------------------------------------------------------------------------------------------------------------------------------------------------------------------------------------------------------------------------------------------------------------------------------------------------------------------------------------------------------------------------------------------------------------------------------------------------------------------------------------------------------------------------------------------------------------------------------------------------------------------------------------------------------------------------------------------------------------------------------------------------------------------------------------------------------------------------------------------------------------------------------------------------------------------------------------------------------------------------------------------------------------------------------------------|
| <p><b>Stage 1: Appraisal</b></p> <ul style="list-style-type: none"> <li>• detect invasive alien crayfish;</li> <li>• consider current status of any other alien and native crayfish in state, river basin, catchment and potential for invasion;</li> <li>• carry out rapid appraisal of technical feasibility, (scale of work likely to be required, potential benefits and potential constraints, start surveys for population distribution, considering potential limits of population now and in the next 1-2 years (in case of delays), and any effects on feasibility);</li> <li>• identify stakeholders and lead agency for next stage, start discussions;</li> <li>• start identifying resources needed and time required to obtain them;</li> <li>• make preliminary decision on benefits and feasibility, define detailed scope of feasibility if proceed (be thorough, but have regard to overall programme and the risks of delay);</li> <li>• start estimating costs;</li> <li>• obtain resources (funding and staff) for assessment stage and seek commitment in principle to funding for treatment stage (subject to feasibility assessment);</li> <li>• consider potential break points, criteria for continuing to the treatment stage or not.</li> </ul>                                                                                                                                                                                                                                                                                                                                                                                                                                                                                                                                                                                                                                                                                                                                                                                                                                                                                                                                                                                                                                                                                                                                                                                                                                                                                                    |
| <p><b>Stage 2: Detailed feasibility assessment and project planning</b></p> <ul style="list-style-type: none"> <li>• appoint project leader;</li> <li>• consult with owners and occupiers, neighbours and regulatory agencies (with results of appraisal, work planned for feasibility and the work and programme if it goes to treatment); identify any stakeholder concerns or issues to be addressed in feasibility and project planning;</li> <li>• survey for extent of crayfish population, assess suitability of habitat in all areas to be treated and decide on extent of any area to be treated (beyond lower limit of detection of crayfish);</li> <li>• survey other fauna as required for impact assessment;</li> <li>• carry out detailed site survey to identify all inflows and outflows and their potential for flow management (if required) and biocide treatment, (plus additional hydrological surveys, tracer study for groundwater or leakage if required);</li> <li>• carry out bathymetric survey to calculate volume of waterbody and identify substrate type by area (sample by underwater photography, grab samples, cores or probing as required); include type, distribution and extent of aquatic plants (emergent, floating and submerged);</li> <li>• carry out toxicity tests with crayfish, water and substrate from site to determine target dosage (and/or estimate the adjustment to be made to target dosage to compensate for likely rate of environmental degradation of biocide during the treatment period, according to condition on site), take account of any likely change in water volume prior to treatment;</li> <li>• prepare a plan of technical operations, programme and quantities, including: biocide, materials, equipment, staff; any advance works, e.g. partial dewatering before treatment (benefit of storage capacity for treated water if rainfall occurs and cost reduction versus increased risk of crayfish above reduced water level), vegetation management; operations during treatment; requirement for any post-treatment management; contingency planning, including allowance for weather, equipment failure and other unplanned events; site security if required;</li> <li>• prepare health and safety risk assessment and environmental risk assessment, including for biomonitoring during treatment as required;</li> <li>• define roles and responsibilities for the operational and post-treatment stages;</li> <li>• make sure any other stakeholder issues have been addressed;</li> </ul> |

|                                                                                                                                                                                                                                                                                                                                                                                                                                                                                                                                                                                                                                                                                                                                                                                                                                                                                                                                                                                                                                                                                                                                                                                                                                                                                                                                                                                                                                                                                                                                                                                                                                                                                                                                                                                                                                                                                                                                                                                  |
|----------------------------------------------------------------------------------------------------------------------------------------------------------------------------------------------------------------------------------------------------------------------------------------------------------------------------------------------------------------------------------------------------------------------------------------------------------------------------------------------------------------------------------------------------------------------------------------------------------------------------------------------------------------------------------------------------------------------------------------------------------------------------------------------------------------------------------------------------------------------------------------------------------------------------------------------------------------------------------------------------------------------------------------------------------------------------------------------------------------------------------------------------------------------------------------------------------------------------------------------------------------------------------------------------------------------------------------------------------------------------------------------------------------------------------------------------------------------------------------------------------------------------------------------------------------------------------------------------------------------------------------------------------------------------------------------------------------------------------------------------------------------------------------------------------------------------------------------------------------------------------------------------------------------------------------------------------------------------------|
| <ul style="list-style-type: none"> <li>• prepare budget for treatment based on operations plan, including for contingencies;</li> <li>• obtain approvals from relevant statutory agencies;</li> <li>• secure funding for full treatment, also for monitoring the outcome;</li> <li>• on basis of detailed feasibility study and any changes in wider conditions since initial appraisal (including status of crayfish on site and in catchment) decide whether to proceed to treatment, if so;</li> <li>• obtain confirmation of landowner acceptance and agreement on any mitigation measures, compensation provision if applicable, or legal provisions;</li> <li>• carry out procurement and contract management (if a contractor is used it may require a high level of site supervision, and commitment to quality of outcome by the contractor);</li> <li>• ensure operations staff have any prior training or qualifications required (e.g. certifications for pesticide spraying, boat handling);</li> <li>• order biocide, materials and equipment well in advance of required time;</li> <li>• plan public communications strategy, for before, during, after treatment.</li> </ul>                                                                                                                                                                                                                                                                                                                                                                                                                                                                                                                                                                                                                                                                                                                                                                                    |
| <p><b>Stage 3: Preparatory works on site</b></p> <ul style="list-style-type: none"> <li>• install plastic barrier fencing to prevent overland movement of crayfish, if it is to be used, plus any temporary or permanent barriers or other controls on outflows (may be done during feasibility studies);</li> <li>• remove fish and/or amphibians if required (with measures to ensure no transfer of crayfish);</li> <li>• carry out any partial dewatering well in advance, if applicable, and track changes in water level and the dryness of margins in the period prior to treatment;</li> <li>• excavate a sample of any potential refuges above water level to check for presence of crayfish (if found, raise water level prior to treatment, or dig out all areas and contain the spoil to avoid escape of crayfish);</li> <li>• manage vegetation to facilitate biocide application if necessary, e.g. mowing, herbicide, partial dredging (with biosecurity to prevent escape of crayfish);</li> <li>• test hydraulic control prior to treatment, if applicable (check for leakage, check pump functioning and the backup pumps);</li> <li>• carry out any enabling works, prepare working area/site compound, define site boundaries with signs and/or fencing to keep people away from treatment areas during application of biocide;</li> <li>• arrange for delivery of materials and equipment, e.g. material for temporary dams, biocide to a secure store, pumps, boats, sprayers, fuel, clean water for washing, materials for bioassays (may need advance collection of crayfish from site or elsewhere), emergency kit, sundry tools and spares;</li> <li>• keep following weather forecasts for before, during and after treatment and amend work programme if necessary (e.g. avoid wet period with risk of high flow if using pump control and have plenty of spare pumping capacity and/or measures to safely abort treatment if necessary).</li> </ul> |
| <p><b>Stage 4: Treatment</b></p> <ul style="list-style-type: none"> <li>• ensure any flow control is operating well;</li> <li>• set up biomonitoring outside treatment area as required (a check for leakage/off-site pollution);</li> <li>• prepare any biomonitoring with 'sentinel' crayfish (to monitor efficacy of biocide treatment during the works), bioassays or chemical tests to record field dosage during works and/or during the recovery period;</li> <li>• ready all equipment and materials;</li> <li>• brief all site staff on safety and all procedures; make sure roles, responsibilities, action plan and contingency procedures are understood by all;</li> <li>• have one or more people not using biocide who can deal with official visitors, media and/or</li> </ul>                                                                                                                                                                                                                                                                                                                                                                                                                                                                                                                                                                                                                                                                                                                                                                                                                                                                                                                                                                                                                                                                                                                                                                                   |

|                                                                                                                                                                                                                                                                                                                                                                                                                                                                                                                                                                                                                                                    |
|----------------------------------------------------------------------------------------------------------------------------------------------------------------------------------------------------------------------------------------------------------------------------------------------------------------------------------------------------------------------------------------------------------------------------------------------------------------------------------------------------------------------------------------------------------------------------------------------------------------------------------------------------|
| <p>members of the public who come to the site;</p> <ul style="list-style-type: none"> <li>• apply biocide to the margins and to the rest of site according to depth plan, with additional application in margins if required (e.g. before dark if there is risk of crayfish emerging); apply pumped circulation, if used;</li> <li>• keep track of quantities of biocide applied in accordance with field dosing plan, note response of wild crayfish especially at the margins;</li> <li>• monitor treatment with caged crayfish, bioassays or other methods (optional, to increase confidence that all areas are adequately treated).</li> </ul> |
| <p><b>Stage 5: Management of post-treatment recovery</b></p> <ul style="list-style-type: none"> <li>• monitor persistence of toxicity (essential part of the operation if flow within the site is managed by diversion, pumping, temporary dams etc., optional at a fully enclosed site);</li> <li>• manage treated water, options include: no treatment, dewater to field, remove off-site, or carry out accelerated degradation of product (e.g. in tanks with sodium hypochlorite - an option if natural pyrethrum is used);</li> <li>• carry out subsequent monitoring of aquatic recovery, with or without restocking of fauna.</li> </ul>    |
| <p><b>Stage 6: Post-treatment monitoring of outcome</b></p> <ul style="list-style-type: none"> <li>• monitor for presence of crayfish annually for 5 years or more;</li> <li>• monitor for presence of crayfish plague if site is intended for re-stocking with native crayfish, (e.g. with cages of susceptible native crayfish, or by sampling for eDNA)</li> </ul>                                                                                                                                                                                                                                                                              |

Supplementary Table S2. Details of projects in the UK where biocide treatment against signal crayfish was carried out

| <b>Site name and number</b>            | <b>1 Gravel pit, Edzell</b>               | <b>2 Mains ponds, Auchenblae</b>          | <b>3 Castle pond, Auchenblae</b>             | <b>4 farm reservoir near Pocklington</b>                      | <b>5 Ballintuim ponds and stream</b>                         | <b>6 Ballachulish quarry</b>     |
|----------------------------------------|-------------------------------------------|-------------------------------------------|----------------------------------------------|---------------------------------------------------------------|--------------------------------------------------------------|----------------------------------|
| <b>Catchment</b>                       | North Esk, Scotland                       | North Esk, Scotland                       | North Esk, Scotland                          | Yorkshire River Derwent, England                              | Ardle (River Tay), Scotland                                  | Leven and Coe, Scotland          |
| <b>Year stocked with crayfish</b>      | c. 1998                                   | c.2002/3                                  | c.2002/3                                     | 1992                                                          | Late 1980s                                                   | 2000s                            |
| <b>Who stocked crayfish and reason</b> | Fishery manager, for fish pond management | Fishery manager, for fish pond management | Fishery manager, for fish pond management    | Fishery manager, for fish pond management                     | Owners, as ornamental stock                                  | Children, aquarium release       |
| <b>Year detected</b>                   | 2004                                      | 2004                                      | 2004                                         | 2002                                                          | 2003                                                         | 2011                             |
| <b>Year feasibility study</b>          | 2004                                      | 2004                                      | 2004                                         | 2003                                                          | 2005                                                         | 2011                             |
| <b>Year treated</b>                    | 2004                                      | 2004 and 2005                             | 2004                                         | 2005                                                          | 2006                                                         | 2012                             |
| <b>Waterbody type</b>                  | Enclosed pond                             | 3 on-line ponds                           | 1 off-line + 100 m small watercourse (ditch) | Enclosed pond                                                 | 1 offline pond, 1 online pond, 680 m small watercourse       | Enclosed pond                    |
| <b>Area (ha)</b>                       | 1.0                                       | 0.02, 0.15, 0.3                           | 0.54                                         | 0.56                                                          | Garden pond 0.08, lower pond 0.1                             | 2                                |
| <b>Depth, (m)</b>                      | 1 - 2.4                                   | 0.2 - 2.0                                 | Mainly 1.0 - 2.5                             | 3.4                                                           | Both 0.5 - 1.8 m, stream 0.1 - 0.25, increased for treatment | 0.5 - 13.0                       |
| <b>Water source</b>                    | Groundwater                               | Dammed stream                             | Channel from river                           | Pumped from river in winter, plus drainage from arable fields | Seasonal inflow, spring seepage                              | Catchment runoff and groundwater |
| <b>pH</b>                              | pH 7.0                                    | pH 6.8                                    | pH 7.0                                       | pH 7.8 - 8.5                                                  | pH 7.0                                                       | c. pH 7                          |

| Site name and number                    | 1 Gravel pit, Edzell                                                                       | 2 Mains ponds, Auchenblae                                                                             | 3 Castle pond, Auchenblae                                                                  | 4 farm reservoir near Pocklington                                                                             | 5 Ballintuim ponds and stream                                                                                                         | 6 Ballachulish quarry                                                                                         |
|-----------------------------------------|--------------------------------------------------------------------------------------------|-------------------------------------------------------------------------------------------------------|--------------------------------------------------------------------------------------------|---------------------------------------------------------------------------------------------------------------|---------------------------------------------------------------------------------------------------------------------------------------|---------------------------------------------------------------------------------------------------------------|
| Substrate                               | Gravel                                                                                     | Sandy clay                                                                                            | Sandy clay                                                                                 | Calcareous clay                                                                                               | Sandy clay (upper), sand (lower pond)                                                                                                 | Slate                                                                                                         |
| Siltation                               | Low                                                                                        | Peat and silt, up to 0.15 m silt in deep water and wetland                                            | Thin silt layer, >0.1 m at depth                                                           | None in steep margins, moderate on flat bed                                                                   | Upper pond: thin silt over butyl lining, lower pond: peat silt over sand                                                              | Low, except in deepest area                                                                                   |
| Vegetation - submerged                  | Moderate cover, 25%                                                                        | Sparse (<5% cover), locally dense (>60% cover) at retreatment                                         | <10%, a few patches                                                                        | Sparse (<2% cover)                                                                                            | Sparse to moderate in garden pond                                                                                                     | None                                                                                                          |
| Vegetation - emergent                   | None                                                                                       | Locally dense floating and emergent grasses, plus standing dead trees                                 | Scattered clumps of rushes around the margin                                               | Tree roots from surrounding willow coppice                                                                    | Reedswamp margins of <i>Typha latifolia</i> in garden pond, waterlilies and ornamental; grass/rushes by stream, wetland at lower pond | Minimal (<1%)                                                                                                 |
| Water temperature at treatment, month   | 9 °C<br>October                                                                            | 15 °C<br>September                                                                                    | 4 °C<br>December                                                                           | 14 °C<br>Late september                                                                                       | 9 - 14 °C<br>October                                                                                                                  | 8 - 22 °C<br>June                                                                                             |
| Biocide used                            | Natural pyrethrum (Pyblast®)                                                               | Natural pyrethrum (Pyblast®)                                                                          | Natural pyrethrum (Pyblast®)                                                               | Natural pyrethrum (Pyblast®)                                                                                  | Natural pyrethrum (Pyblast®)                                                                                                          | Natural pyrethrum (Pyblast®)                                                                                  |
| Target dosage (µg/l natural pyrethrins) | 150                                                                                        | 200                                                                                                   | 200                                                                                        | 200                                                                                                           | 1000 in ponds, 2000 in stream                                                                                                         | 500                                                                                                           |
| Application method                      | Margins: backpack sprayers, Pond: hand-held 4-jet sprayer lance from sprayer tank on boat. | 1st: margins: backpack sprayers Ponds (1-3): hand-held 4-jet sprayer lance from sprayer tank on boat, | Margins: backpack sprayers, Pond: hand-held 4-jet sprayer lance from sprayer tank on boat. | Margins: backpack sprayer from boat pond: fixed front-mounted sprayer boom on boat. Large-capacity irrigation | Margins: backpack sprayers, all sites; garden pond: hand-held 4-jet sprayer from boat; pour-on biocide at intakes of                  | Margins: backpack sprayers; drenching margins with treated water from pond, pond: sprayer lance from backpack |

| Site name and number                                                                | 1 Gravel pit, Edzell | 2 Mains ponds, Auchenblae                                                                                                                                     | 3 Castle pond, Auchenblae                                                                                                                             | 4 farm reservoir near Pocklington                                                                                      | 5 Ballintuim ponds and stream                                                                                                                                                                                    | 6 Ballachulish quarry                                                                                                                                                                                                                   |
|-------------------------------------------------------------------------------------|----------------------|---------------------------------------------------------------------------------------------------------------------------------------------------------------|-------------------------------------------------------------------------------------------------------------------------------------------------------|------------------------------------------------------------------------------------------------------------------------|------------------------------------------------------------------------------------------------------------------------------------------------------------------------------------------------------------------|-----------------------------------------------------------------------------------------------------------------------------------------------------------------------------------------------------------------------------------------|
|                                                                                     |                      | 2nd: margins: backpack sprayer; ponds: sprayer from boat, plus pour on biocide near the intake of two or more pumps on the bank; more on lower pond next day. |                                                                                                                                                       | pump run for 6 hours for mixing after treatment. Intake and output hoses set widely apart to induce water circulation. | pumps on the bank; Stream: backpack sprayers then pumped recirculation; separate dosing of natural seepages. Lower pond: sprayer from boat, pour-on at pump intake; pump treated water to drench wetland margin. | sprayers and larger tanks on boats; pump on biocide via vertical pipe mounted on boat, in deep areas. After application, boat driven criss-cross over site. Three pumps on banks with intake and output hoses wide apart to aid mixing. |
| Hydraulic control by pumping required                                               | None                 | Inflow diverted; intermittent return pumping from downstream sump.                                                                                            | Continuous return-pumping of leakage 18-25 l s <sup>-1</sup> from pond. Level reduced before treatment (unplanned). Ditch dammed, with recirculation. | None                                                                                                                   | Complex, re-circulation pumping on 5 successive (overlapped) sections of stream; dewater of ponds post-treatment                                                                                                 | Intermittent inflows blocked above quarry face                                                                                                                                                                                          |
| Number of days for preparation on site and full treatment (excluding prior surveys) | 3 (x2 treatments)    | 2 (x2 treatments)                                                                                                                                             | 22                                                                                                                                                    | 3                                                                                                                      | 26                                                                                                                                                                                                               | 6                                                                                                                                                                                                                                       |
| Number of staff per day during treatment                                            | 2 - 6                | 2 - 7                                                                                                                                                         | 1 - 6, + 1 at night                                                                                                                                   | 5                                                                                                                      | Main works, 8 - 10 by day, +1 at night, reduced in recovery phase.                                                                                                                                               | 4 - 20                                                                                                                                                                                                                                  |

| Site name and number                                                                                                                                                                                                                                          | 1 Gravel pit, Edzell                                                                                              | 2 Mains ponds, Auchenblae                                                                                                                        | 3 Castle pond, Auchenblae                                                                                              | 4 farm reservoir near Pocklington                                                                                                          | 5 Ballintuim ponds and stream                                                                                                                                                                                                                                | 6 Ballachulish quarry                                                                                                                                                                                                                                                                                                                                                                                               |
|---------------------------------------------------------------------------------------------------------------------------------------------------------------------------------------------------------------------------------------------------------------|-------------------------------------------------------------------------------------------------------------------|--------------------------------------------------------------------------------------------------------------------------------------------------|------------------------------------------------------------------------------------------------------------------------|--------------------------------------------------------------------------------------------------------------------------------------------|--------------------------------------------------------------------------------------------------------------------------------------------------------------------------------------------------------------------------------------------------------------|---------------------------------------------------------------------------------------------------------------------------------------------------------------------------------------------------------------------------------------------------------------------------------------------------------------------------------------------------------------------------------------------------------------------|
| <b>Crayfish toxicity test – cages in pond during treatment</b><br><b>Crayfish condition: SR- self-righting NSR – not self-righting T – torpid D – dead</b><br><br><b>Crayfish from trapping, size range c. 25 – 55 mm cl (carapace length), male ~ female</b> | 20 cages of 10 crayfish (treatment 2 only). After 48 hours: 0 SR, 3% NSR, 66% T, 31% D, (all dead within 5 days). | 13 cages of 25 crayfish in one pond, 2 cages in another (treatment 2). After 48 hours: 6.6% SR, 4.4% NSR, 9.8% T, 79.2% D (all d within 5 days). | 20 cages of 10 crayfish. After 48 hours: 0 SR, 0.5% NSR, 63.7% T, 35.8% D (all d within 5 days).                       | 16 cages of 20 crayfish, 2 of 25 crayfish. After 48 hours: 0 SR, 0 NSR, 2.4% T, 97.3% D; (all D within 4 days).                            | Garden pond: 22 cages of 15 crayfish, 5 stream sections: 5 cages of 10 each, plus 4-8 artificial burrows with 4 each). 0 SR 0 NSR recorded. After 48 hours: garden pond 17% T, 83% D; lower pond 9% T, 91% D; stream sections s1-5, %D: 100, 56, 74, 85, 71. | 13 cages of 10 signal crayfish, after 24 hours from start of treatment: 8.5% SR, 4.6% NSR, 21.5% T, 65.4% D (1 cage had 10 SR). Cage with 10 SR back to pond. Other 34 survivors to clean water, mortality 100% within 48 hours since treatment. Additional application on day 2, SR survivors plus 11 new cages. New cages after 24 hours: 9.2% T, 90.8% D (plus all D all in repeat cage). All D within 48 hours. |
| <b>toxicity test – water samples 24 hours after dosing (5 crayfish/sample)</b><br><b>Crayfish condition: SR- self-righting NSR – not self-righting</b>                                                                                                        | 4 samples; after 24 hours: 0 SR, 0 NSR, 26% T, 74% D; after 48 hours: 100% D.                                     | 6 samples; after 24 hours: 100% D (in <2 hours in 2 samples, <9 hours others).                                                                   | 6 samples, 3 crayfish each; after 24 hours: 0 SR, 16% NSR, 55% T, 27% D. At 48 hours: 0 SR, 11% NSR, 44.5% T, 44.5% D. | 6 samples; after 24 hours: 0 SR, 0 NSR, 10% T, 90% D; after 48 hours: 100% D. Repeated test 48 hours after dosing, after 48 hours: 100% D. | Garden pond, 3 samples; after 24 hours: 0 SR, 0 NSR, 48.7% T, 51.3% D; after 48 hours: 17% T, 83% D. Repeated test 48 hours after dosing; after 24                                                                                                           | Not run, <i>Gammarus</i> bioassays only. Samples immediately after second treatment estimate 0.75 mg/l in the deep water and 1.2 mg/l in the                                                                                                                                                                                                                                                                        |



| Site name and number                                                                       | 1 Gravel pit, Edzell                                                                                                                                                                               | 2 Mains ponds, Auchenblae                                                                                                                                                                                                                    | 3 Castle pond, Auchenblae                  | 4 farm reservoir near Pocklington | 5 Ballintuim ponds and stream                                                         | 6 Ballachulish quarry |
|--------------------------------------------------------------------------------------------|----------------------------------------------------------------------------------------------------------------------------------------------------------------------------------------------------|----------------------------------------------------------------------------------------------------------------------------------------------------------------------------------------------------------------------------------------------|--------------------------------------------|-----------------------------------|---------------------------------------------------------------------------------------|-----------------------|
| T – torpid<br>D - dead                                                                     |                                                                                                                                                                                                    |                                                                                                                                                                                                                                              |                                            |                                   | hours: 46.6% T, 53.4% D. Lower pond 2 samples, all D within 48 hours.                 | shallow margins.      |
| time until water not toxic repeated bioassays with Gammarus pulex) unless otherwise stated | c. 24 days, estimated from observed recolonization by invertebrates                                                                                                                                | 21 - 24 days                                                                                                                                                                                                                                 | 21 days (bioassays with Asellus aquaticus) | 115 - 134 days (from              | 23 days for garden pond; 7-11 days for stream sections and lower pond, with flushing. | 34 - 60 days          |
| Re-treatment <sup>5</sup> carried out                                                      | Yes, 24 days later. First treatment not effective due to residue from prior deoxygenation with sodium sulphite (not used subsequently). Details below are for the retreatment using pyrethrum only | Yes, 11 months later. First treatment had ineffective deoxygenation pre-treatment; details are for retreatment, using natural pyrethrum only. First treatment all areas, re-treatment two ponds, upper pond wetland area, surface spray only | No                                         | No                                | No                                                                                    | No                    |
| Stocked with fish after treatment                                                          | No                                                                                                                                                                                                 | No                                                                                                                                                                                                                                           | Yes                                        | No                                | Yes                                                                                   | No                    |
| Number of years of post-treatment monitoring                                               | 5                                                                                                                                                                                                  | 5                                                                                                                                                                                                                                            | 5                                          | 5                                 | 2 intensive, then <i>ad hoc</i> by owner                                              | 5                     |

| Site name and number                                               | 1 Gravel pit, Edzell                                                              | 2 Mains ponds, Auchenblae                                                      | 3 Castle pond, Auchenblae                                                       | 4 farm reservoir near Pocklington                                                          | 5 Ballintuim ponds and stream                                                                  | 6 Ballachulish quarry                                                                   |
|--------------------------------------------------------------------|-----------------------------------------------------------------------------------|--------------------------------------------------------------------------------|---------------------------------------------------------------------------------|--------------------------------------------------------------------------------------------|------------------------------------------------------------------------------------------------|-----------------------------------------------------------------------------------------|
| <b>Annual post-treatment monitoring method and effort</b>          | 100 - 125 traps for 1 night, mixed types, mainly fine-mesh funnel traps (Fladen). | 110 - 135 traps for 1 night, mixed types mainly Fladen.                        | 100 traps for 1 night, mixed type for first 3 years; 60 traps for next 2 years. | 100 - 107 traps for 1 night; plus 6 fyke nets (with 3m long leading net) in years 1 and 2. | 150 traps for 1 night, mixed types, mainly Fladen.                                             | 15 - 17 Fladen traps checked and reset daily in summer; 195 - 267 trap nights per year. |
| <b>Outcome: crayfish caught in number of years after treatment</b> | No crayfish, eradication                                                          | Crayfish detected year 2 (upper and middle ponds) and year 3 (all three ponds) | Crayfish detected year 2                                                        | No crayfish, eradication                                                                   | No crayfish in stream and lower pond; crayfish detected garden pond year 2 and abundant year 7 | No crayfish, eradication                                                                |

Table S3. Details of projects in Norway and Sweden where treatment against signal crayfish was carried out using synthetic pyrethroids

| Site name                              | Smöjen, Sweden                              | Stenkyrka, Sweden                     | Hangvar, Sweden            | Dammane ponds, Norway                               | Ostøya golf course ponds, Norway                       |
|----------------------------------------|---------------------------------------------|---------------------------------------|----------------------------|-----------------------------------------------------|--------------------------------------------------------|
| <b>Catchment</b>                       | Gotland coastal catchment                   | Gotland coastal catchment             | Gotland coastal catchment  | Dammane, Eidanger coastal catchment                 | Ostøya                                                 |
| <b>Year stocked with crayfish</b>      | C.1970                                      | 1984, in belief it was noble crayfish | Probably early 1970s       | Uncertain, probably in the 1980s                    | Uncertain, probably in the 1990s                       |
| <b>Who stocked crayfish and reason</b> | Unknown person for harvest                  | Pond owner for aquaculture/harvest    | Unknown person for harvest | Unknown person, but probably stocked for harvesting | Unknown person, but probably to keep vegetation at bay |
| <b>Year detected</b>                   | 1985                                        | 1985                                  | 2005                       | 2006                                                | 2009                                                   |
| <b>Year feasibility study</b>          | 2006 - 2008                                 | 2007                                  | 2006 to 2008               | 2007                                                | Not done                                               |
| <b>Year treated</b>                    | August 2008 and November 2008               | August 2008                           | August 2009                | 14th and 28th May 2008                              | 14th and 25th October 2009                             |
| <b>Waterbody type</b>                  | Limestone quarry with 2 separate ponds with | Pond for irrigation                   | Marble quarry              | 5 on-line ponds                                     | 6 off-line ponds, connected by water pipelines         |

| Site name                           | Smöjen, Sweden                           | Stenkyrka, Sweden                                           | Hangvar, Sweden                | Dammane ponds, Norway                        | Ostøya golf course ponds, Norway                                              |
|-------------------------------------|------------------------------------------|-------------------------------------------------------------|--------------------------------|----------------------------------------------|-------------------------------------------------------------------------------|
|                                     | interconnection                          |                                                             |                                |                                              |                                                                               |
| Area (ha)                           | 1 and 1.4                                | 2.3                                                         | 0.35                           | 0.037 – 0.32                                 | 0.037 – 0.24                                                                  |
| Depth (m)                           | 3.1 - 3.8                                | Unknown<br>(variable volume up to 100 000 m <sup>2</sup> )  | 0.5 - 5.0                      | 0.82 – 2.27                                  | 1.8 – 3.0                                                                     |
| Water source                        | Groundwater and surface runoff           | Surface runoff pumped into pond from ditch                  | Groundwater and surface runoff | Seasonal inflow, catchment runoff            | Groundwater (pumps). Surface runoff. All ponds are connected.                 |
| pH                                  | 8.4                                      | 8.3                                                         | Unknown                        | Unknown                                      | Unknown                                                                       |
| Substrate                           | Rock and gravel of limestone             | Sandy clay                                                  | Rock and gravel                | Sandy clay and gravel                        | Sandy clay                                                                    |
| Siltation                           | Low to moderate in deeper parts          | Moderate                                                    | Low                            | Moderate                                     | Moderate, except for deep parts                                               |
| Vegetation - submerged              | Sparse to moderate with mainly stonewort | Moderate                                                    | Sparse                         | Sparse                                       | Sparse in one pond, other ponds moderate to dense.                            |
| Vegetation - emergent               | Moderate, with reed in some parts        | Sparse, with some patches of grass, pondweed, rush and reed | Sparse                         | Sparse                                       | Sparse in one pond, the other moderate to dense floating and emergent grasses |
| Water temperature at treatment (°C) | Treatment 1. 19.0<br>Treatment 2. 6.0    | 19.0                                                        | 19.6                           | Treatment 1: 15-16,5<br>Treatment 2: 14-16,5 | Treatment: 1. 5-6,5<br>Treatment 2: 3.4-4.5                                   |
| Biocide used                        | Deltamethrin                             | Deltamethrin                                                | Deltamethrin                   | Cypermethrin (BETAMAX VET®)                  | Cypermethrin (BETAMAX VET®)                                                   |

| Site name                                    | Smöjen, Sweden                                                                                                                                                                                                                             | Stenkyrka, Sweden                                                                                                                                                                                                                          | Hangvar, Sweden                                                                                                                                                                                                                                              | Dammane ponds, Norway                                                                                                                                                                     | Ostøya golf course ponds, Norway                                                                                            |
|----------------------------------------------|--------------------------------------------------------------------------------------------------------------------------------------------------------------------------------------------------------------------------------------------|--------------------------------------------------------------------------------------------------------------------------------------------------------------------------------------------------------------------------------------------|--------------------------------------------------------------------------------------------------------------------------------------------------------------------------------------------------------------------------------------------------------------|-------------------------------------------------------------------------------------------------------------------------------------------------------------------------------------------|-----------------------------------------------------------------------------------------------------------------------------|
| <b>Target dosage (active ingredient)</b>     | 0.5 µg/l<br>(actual concentration when analysed:<br>first treatment 0.5 and 0.6 µg/l<br>second treatment 0.5 and 1.0 µg/l)                                                                                                                 | 0.5 µg/l<br>(actual concentration when analysed: 0.6 µg/l)                                                                                                                                                                                 | 0.5 µg/l<br>(actual concentration when analysed: 4.3 µg/l)                                                                                                                                                                                                   | 20 µg/l                                                                                                                                                                                   | 20 µg/l                                                                                                                     |
| <b>Application method</b>                    | Diluted 1:10, spread evenly from boat; further mixed by driving boat crisscross over surface. Margins sprayed using backpack sprayer; pond water pumped onto margins and identified difficult areas, e.g. cracked cliffs and stony debris. | Diluted 1:10, spread evenly from boat; further mixed by driving boat crisscross over surface. Margins sprayed using backpack sprayer; pond water pumped onto margins and identified difficult areas, e.g. cracked cliffs and stony debris. | Deltamethrin diluted 1:10, spread evenly from boat; further mixed by driving boat crisscross over pond surface. Margins sprayed using backpack sprayer; pond water pumped onto margins and identified difficult areas, e.g. cracked cliffs and stony debris. | Pumps (boat and land based for application to ponds at 1:100 dilution), small inflows continuous dosing from drip cans (4 hours) and garden watering-cans to dose small areas and margins | Pumps (boat and land based for application to ponds), drip cans and garden watering- cans to dose small inflows and margins |
| <b>Hydraulic control by pumping required</b> | Continuous recirculation by pumping for 2 days                                                                                                                                                                                             | Continuous recirculation by pumping for 1 day                                                                                                                                                                                              | Continuous recirculation by pumping for 1 day                                                                                                                                                                                                                | All ponds were drained after treatment in early June and late December 2008                                                                                                               | All ponds except one, were drained after treatment, during mid-November to mid-December                                     |

| Site name                                                                           | Smöjen, Sweden                                                                                                                                                                                                                                  | Stenkyrka, Sweden                                                                                                             | Hangvar, Sweden                                                                                                                                                            | Dammane ponds, Norway                                                                      | Ostøya golf course ponds, Norway                                 |
|-------------------------------------------------------------------------------------|-------------------------------------------------------------------------------------------------------------------------------------------------------------------------------------------------------------------------------------------------|-------------------------------------------------------------------------------------------------------------------------------|----------------------------------------------------------------------------------------------------------------------------------------------------------------------------|--------------------------------------------------------------------------------------------|------------------------------------------------------------------|
| Number of days for preparation on site and full treatment (excluding prior surveys) | 3                                                                                                                                                                                                                                               | 2                                                                                                                             | 2                                                                                                                                                                          | 2                                                                                          | 2                                                                |
| Number of staff per day during treatment                                            | Up to 5                                                                                                                                                                                                                                         | 5                                                                                                                             | 4                                                                                                                                                                          | 4 for each treatment                                                                       | 3 for each treatment                                             |
| Crayfish toxicity test                                                              | 5 cages each with 3 noble crayfish placed in each pond, checked repeated during treatment. All crayfish dead within 24 hours.                                                                                                                   | 5 cages each with 3 noble crayfish placed in each pond, checked repeated during treatment. All crayfish dead within 24 hours. | 4 cages each with 3 noble crayfish placed in each pond, checked repeated during treatment. All crayfish dead within 24 hours.                                              | 4 cages of 3 signal crayfish in one pond, during each treatment. All dead within 18 hours. | 4 cages of 3 signal crayfish in one pond, during each treatment. |
| Days until water not toxic                                                          | 1 month after first treatment: 0.009 and 0.0 µg/l in the two ponds. No further death in caged noble crayfish 27 days post treatment.<br>3.5 month after second treatment: 0.008 and 0.003 µg/l. Slow breakdown probably due to low temperature. | 1 month after treatment: 0.01 µg/l. No further death in caged noble crayfish 16 days post treatment                           | 1 month after treatment: 0.033 µg/l. 2 months after treatment: 0.002 µg/l. No deaths in caged noble crayfish introduced into pond two months and three days post treatment | Not known                                                                                  | Not known                                                        |
| Re-treatment carried out                                                            | Yes, second treatment after 2.5                                                                                                                                                                                                                 | No                                                                                                                            | No                                                                                                                                                                         | Each locality treated twice (see above)                                                    | Each locality treated twice (see above)                          |

| Site name                                                          | Smöjen, Sweden                                                                                                                | Stenkyrka, Sweden                                                                                                             | Hangvar, Sweden                                                                                                               | Dammane ponds, Norway                                                                         | Ostøya golf course ponds, Norway                                                              |
|--------------------------------------------------------------------|-------------------------------------------------------------------------------------------------------------------------------|-------------------------------------------------------------------------------------------------------------------------------|-------------------------------------------------------------------------------------------------------------------------------|-----------------------------------------------------------------------------------------------|-----------------------------------------------------------------------------------------------|
|                                                                    | months                                                                                                                        |                                                                                                                               |                                                                                                                               |                                                                                               |                                                                                               |
| <b>Stocked with fish or indigenous crayfish after treatment</b>    | Stocked with noble crayfish in year after treatment                                                                           | Stocked with noble crayfish 2 months after treatment                                                                          | Stocked with noble crayfish by unknown, probably landowner                                                                    | No (not stocked with noble crayfish)                                                          | Yes, with fish (not stocked with noble crayfish)                                              |
| <b>Number of years of post-treatment monitoring</b>                | 7                                                                                                                             | 7                                                                                                                             | 6                                                                                                                             | 6                                                                                             | 6                                                                                             |
| <b>Annual post-treatment monitoring method and effort</b>          | Visual check for signal crayfish the same year as treated. Later check on stocked noble crayfish, both visual and with traps. | Visual check for signal crayfish the same year as treated. Later check on stocked noble crayfish, both visual and with traps. | Visual check for signal crayfish the same year as treated. Later check on stocked noble crayfish, both visual and with traps. | Caged living noble crayfish and water samples for detection of crayfish plague. Trap-fishing. | Caged living noble crayfish and water samples for detection of crayfish plague. Trap-fishing. |
| <b>Outcome, crayfish caught in number of years after treatment</b> | No signal crayfish detected,<br>Eradication<br>Only noble crayfish found, ongoing 7+ years after stocking                     | No signal crayfish detected,<br>Eradication<br>Only noble crayfish found, ongoing 7+ years after stocking                     | No signal crayfish detected<br>Eradication<br>Only noble crayfish found, ongoing 6+ years after stocking                      | No signal crayfish detected,<br>Eradication                                                   | No signal crayfish detected,<br>Eradication                                                   |

Table S4. Summary of projects in the UK in which feasibility of biocide treatment against signal crayfish was assessed, but treatment was not carried out

| Site name                  | 7 ponds near Holt                                     | 8 ponds near Painscastle                                               | 9 Ribble tributary                                                                                          | 10 ponds near Llyswen                                                  | 11 quarry pond                                               | 12 north Cumbria ponds + river                                                 | 13 south Cumbria ponds                                   |
|----------------------------|-------------------------------------------------------|------------------------------------------------------------------------|-------------------------------------------------------------------------------------------------------------|------------------------------------------------------------------------|--------------------------------------------------------------|--------------------------------------------------------------------------------|----------------------------------------------------------|
| Catchment                  | Glaven, England                                       | Bachawy, Wales                                                         | Ribble, England                                                                                             | Wye, Wales                                                             | Tweed, Scotland                                              | Eden, England                                                                  | confidential                                             |
| Year stocked with crayfish | Early 1980s                                           | 1990s                                                                  | Late 1990s                                                                                                  | After 1996                                                             | Unknown                                                      | Unknown                                                                        | Unknown                                                  |
| Stocked by                 | Owners, as ornamental                                 | Owners, as ornamental                                                  | Individuals, for wild harvest                                                                               | Without owner's knowledge, probably angler                             | Unknown                                                      | Owners, as ornamental                                                          | Unknown                                                  |
| Year detected              | 2007                                                  | 2005                                                                   | 2002                                                                                                        | 2012                                                                   | 2009                                                         | 2012                                                                           | 2011                                                     |
| Feasibility study          | 2009                                                  | 2009                                                                   | 2005                                                                                                        | 2012                                                                   | 2010                                                         | 2012                                                                           | 2011                                                     |
| Year of work               | 2009-2010, surveys and detailed planning              | 2010, planning; 2011-2012, planning, barrier fencing, amphibian survey | 2006-2007 planning, funding, detailed design, surveys; 2008 groundwater tracing, tests on hydraulic control | 2012 crayfish survey, cost benefit assessment; experimental dewatering | 2011, some planning, 2012 test of partial dewater, re-costed | 2012 site appraisal only, considering ark site options for indigenous crayfish | 2012 funding, delay, test of partial dewater carried out |
| Waterbody type             | Series of small interconnected garden ponds+mill leat | 6 ponds (3 linked) dug by river                                        | Small headwater stream                                                                                      | 2 online ponds plus ditches and culverts                               | Former quarry                                                | Garden pond, small outfall stream, plus section of river                       | 1 site with 2 small ponds, 1 site large                  |
| Area (ha)                  | 0.09, 0.18, + 800m                                    | 0.01-0.3                                                               | 2.5 km                                                                                                      | 0.5, 1.0                                                               | c. 2                                                         | <0.3, + watercourses                                                           | <0.5 - c. 3                                              |
| Water source               | Catchment runoff/ spring seepages                     | Catchment runoff/ spring seepages                                      | Catchment runoff+baseflow                                                                                   | Mill leat and land drains                                              | Groundwater                                                  | Unknown                                                                        | Catchment runoff/ spring seepages                        |
| Stage terminated           | 3 (preparations)                                      | 3 (preparations)                                                       | 3 (preparations)                                                                                            | 1 (appraisal)                                                          | 2 (detailed feasibility)                                     | 1 (appraisal)                                                                  | 1 (appraisal)                                            |

Supplementary Table S5. Annual monitoring results of crayfish trapping at sites treated with natural pyrethrum

| waterbody (ha)                  | years since treatment                  | 0 (before treatment ) | 1               | 2                      | 3                      | 4               | 5               | average trap area (m <sup>2</sup> ) |
|---------------------------------|----------------------------------------|-----------------------|-----------------|------------------------|------------------------|-----------------|-----------------|-------------------------------------|
| Gravel pit (site 1)<br>(1.0)    | crayfish<br>Traps (CPUE <sup>1</sup> ) | 241<br>80 (3.0)       | 0<br>100 (0)    | 0<br>111 (0)           | 0<br>125 (0)           | 0<br>115 (0)    | 0<br>108 (0)    | 89.9                                |
| Mains ponds (site 2)            |                                        |                       |                 |                        |                        |                 |                 |                                     |
| lower pond (0.3)                | crayfish<br>traps                      | 2<br>10 (0.2)         | 3*<br>25 (0.12) | 0<br>90 (0)            | 0<br>75 (0)            | 3<br>75 (0.4)   | 0<br>75 (0)     | 54.7                                |
| middle pond (0.15)              | crayfish<br>Traps (CPUE)               | 0<br>5 (0)            | 0*<br>10 (0)    | 0<br>12 (0)            | <b>1</b><br>45 (0.02)  | 5<br>30 (0.17)  | 11<br>30 (0.37) | 81.7                                |
| upper pond (0.02)               | crayfish<br>traps                      | 0<br>5 (0)            | ns<br>ns        | 0<br>8 (0)             | <b>1</b><br>15 (0.07)  | 2<br>8 (0.25)   | 0<br>15 (0)     | 19.2                                |
| Castle pond (site 3)<br>(0.54)  | crayfish<br>Traps (CPUE)               | 16<br>20 (0.8)        | 0<br>45 (0)     | <b>1</b><br>100 (0.01) | 0<br>100 (0)           | 13<br>60 (0.22) | 5<br>60 (0.08)  | 81.6                                |
| Farm reservoir (site 4)<br>0.56 | crayfish<br>Traps (CPUE)               | 185<br>98 (1.9)       | 0<br>88 (0)     | 0<br>100 (0)           | 0<br>107 (0)           | 0<br>100 (0)    | 0<br>100 (0)    | 56.8                                |
|                                 | crayfish<br>fyke nets (CPUE)           | 208<br>6 (34.6)       | 0<br>6 (0)      | ns<br>6                | ns<br>ns               | ns<br>ns        | ns<br>ns        |                                     |
| Ballintuim (site 5)             |                                        |                       |                 |                        |                        |                 |                 |                                     |
| garden pond (0.54)              | crayfish<br>Traps (CPUE)               | 109<br>40 (2.4)       | 0<br>96 (0)     | 0<br>100 (0)           | <b>1</b><br>100 (0.01) | ns<br>ns        | ns<br>ns        | 54.8                                |
| stream                          | crayfish                               | 0 (4 by hand)         | 0               | 0                      | 0                      | ns              | ns              |                                     |
|                                 | traps                                  | 10 (0)                | 10 (0)          | 10 (0)                 | 10 (0)                 | ns              | ns              |                                     |
| lower pond (0.18)               | crayfish<br>Traps (CPUE)               | 0<br>40 (0)           | 0<br>40 (0)     | 0<br>40 (0)            | 0<br>40 (0)            | ns<br>ns        | ns<br>ns        | 45.0                                |
| Ballachulish (site 6)<br>(2.3)  | crayfish<br>Total trap nights (CPUE)   | 14<br>36 (0.39)       | 0<br>200 (0)    | 0<br>200 (0)           | 0<br>195 (0)           | 0<br>200 (0)    | 0<br>267 (0)    |                                     |

1 CPUE = Catch Per Unit Crayfish (crayfish/number of traps)

\* Mains ponds re-treatment one year after first treatment, year numbering from first treatment

Crayfish catches in bold are those which showed failure to fully eradicate the population.
